# Supplementary material
Source: PubMed Central journal article supplement (PMC5371402)
Supplement: NIHMS852883-supplement-Table_2.pdf [file NIHMS852883-supplement-Table_2.pdf]

Table 2. Demographic Table of Stakeholder Characteristics

|                       | Residents (N=5) |       | Family (N=7) |        | Physicians (N=5) |        | APRNs (N=8) |        | ADMINS (N=6) |        |
|-----------------------|-----------------|-------|--------------|--------|------------------|--------|-------------|--------|--------------|--------|
|                       | N               | (%)   | N            | (%)    | N                | (%)    | N           | (%)    | N            | (%)    |
| Age (yrs.)            |                 |       |              |        |                  |        |             |        |              |        |
| Mean (SD)             | 87.4            | (7.2) | 66.3         | (13.7) | 50.5             | (15.2) | 49.4        | (13.7) | 44.5         | (9.4)  |
| Range                 | 80-97           |       | 47-83        |        | 35-65            |        | 31-64       |        | 30-59        |        |
| Gender                |                 |       |              |        |                  |        |             |        |              |        |
| Male                  | 1               | (20)  | 0            | (0)    | 2                | (40)   | 0           | (0)    | 1            | (16.7) |
| Female                | 4               | (80)  | 7            | (100)  | 3                | (60)   | 8           | (100)  | 5            | (83.3) |
| Race/Ethnicity        |                 |       |              |        |                  |        |             |        |              |        |
| White                 | 4               | (80)  | 6            | (85.7) | 5                | (100)  | 4           | (50)   | 6            | (100)  |
| Hispanic              | 1               | (20)  | 1            | (14.3) | 0                | (0)    | 0           | (0)    | 0            | (0)    |
| Asian                 | 0               | (0)   | 0            | (0)    | 0                | (0)    | 2           | (25)   | 0            | (0)    |
| Other                 | 0               | (0)   | 0            | (0)    | 0                | (0)    | 2           | (25)   | 0            | (0)    |
| Highest education     |                 |       |              |        |                  |        |             |        |              |        |
| < than HS             | 1               | (20)  | 0            | (0)    | 0                | (0)    | 0           | (0)    | 0            | (0)    |
| HS grad               | 4               | (80)  | 4            | (57.2) | 0                | (0)    | 0           | (0)    | 1            | (16.7) |
| Bachelor's            | 0               | (0)   | 2            | (28.6) | 0                | (0)    | 0           | (0)    | 3            | (50)   |
| Master's              | 0               | (0)   | 0            | (0)    | 0                | (0)    | 5           | (62.5) | 2            | (33.3) |
| Doctorate             | 0               | (0)   | 1            | (14.3) | 5                | (100)  | 3           | (37.5) | 0            | (0)    |
| Care plan meeting     |                 |       |              |        |                  |        |             |        |              |        |
| (Resident/Family)     |                 |       |              |        | N/A              |        | N/A         |        | N/A          |        |
| Invited               | 2               | (40)  | 5            | (71.4) |                  |        |             |        |              |        |
| Never invited         | 2               | (40)  | 1            | (14.3) |                  |        |             |        |              |        |
| Unsure                | 1               | (20)  | 1            | (14.3) |                  |        |             |        |              |        |
| (Providers)           |                 |       |              |        |                  |        |             |        |              |        |
| Never attended        | 2               | (40)  | 1            | (14.3) | 0                | (0)    | 0           | (0)    | 0            | (0)    |
| < 1 month ago         | 2               | (40)  | 1            | (14.3) | 4                | (80)   | 4           | (50)   | 5            | (83.3) |
| < 1 year ago          | 0               | (0)   | 4            | (57.1) | 1                | (20)   | 0           | (0)    | 0            | (0)    |
| >1 year ago           | 0               | (0)   | 0            | (0)    | 0                | (0)    | 4           | (50)   | 0            | (0)    |
| Unsure/Missing        | 1               | (20)  | 1            | (14.3) | 0                | (0)    | 0           | (0)    | 1            | (16.7) |
| Gero. Specialty/Cert. |                 |       |              |        |                  |        |             |        |              |        |
| Yes                   | N/A             |       | N/A          |        | 1                | (20)   | 4           | (50)   | N/A          | ----   |
| No                    |                 |       |              |        | 4                | (80)   | 4           | (50)   | N/A          | ----   |
| Yrs. of Experience    |                 |       |              |        |                  |        |             |        |              |        |
| Mean (SD)             | N/A             |       | N/A          |        | 19.6             | (11.7) | 22.6        | (16.0) | 15.6         | (5.6)  |
